# Supplementary material for: The Pivotal Role of Benzimidazole in Improving the Thermal and Dielectric Performance of Upilex-Type Polyimide
Source: MDPI journal article supplement (doi:10.3390/polym15102343), 2023-05-17
Supplement: s1 [file s1]

# Supplementary Materials: The Pivotal Role of Benzimidazole in Improving the Thermal and Dielectric Performance of Upilex-Type Polyimide

Meng Lian <sup>1</sup>, Fei Zhao <sup>1</sup>, Jun Liu <sup>1</sup>, Faqin Tong <sup>2</sup>, Lingbin Meng <sup>1</sup>, Yongqi Yang <sup>1</sup>  
and Feng Zheng <sup>3,\*</sup>

<sup>1</sup> Shandong Engineering Laboratory for Clean Utilization of Chemical Resources, Weifang University of Science and Technology, Weifang 262700, China; menglian@alumni.sjtu.edu.cn (M.L.); zhaofei@wfust.edu.cn (F.Z.); junliu@smail.nju.edu.cn (J.L.); mlb8124@126.com (L.M.); yongqiyang@wfust.edu.cn (Y.Y.)

<sup>2</sup> Shanghai Sinochem Technology Co., Ltd., Kangwei Road 299, Pudong New District, Shanghai 201210, China; lanfeng@tongji.edu.cn

<sup>3</sup> School of Chemical Science and Engineering, Tongji University, Siping Road 1239, Shanghai 200092, China

\* Correspondence: fzheng@tongji.edu.cn

## The synthesis and characterization of 4,4'-[5,5'-bi-1H-benzimidazole]-2,2'-diylbis-benzenamine (BB)

The synthesis procedure was shown in Scheme S1 as follows: 160 g Poly(phosphoric acid), 10.7 g 3,3'-diaminobenzidine (50 mmol) and 13.7 g 4-aminobenzoic acid (100 mmol) were added to a dried 500 mL three-neck flask equipped with a thermometer, condenser, and a mechanical stirrer. The mixture was heated to 200 °C and reacted at this temperature for 12 h. Then cooled to 60 °C and poured into ice-cold water with rapid stirring. Finally, the precipitate formed was soaked in a 5% sodium hydrogen carbonate solution overnight. The crude product was purified by chromatography eluting with ethyl acetate/ethanol (3:1, v/v) to afford a light yellow solid. The crude product dissolved DMSO and then precipitated in water to obtain a white solid. <sup>1</sup>H NMR (500 MHz, DMSO-*d*<sub>6</sub>) δ 12.51 (s, 2H), 7.88 (d, *J* = 8.5 Hz, 4H), 7.73 (s, 2H), 7.57 (d, *J* = 7.6 Hz, 2H), 7.47 (dd, *J* = 8.3, 1.5 Hz, 2H), 6.70 (d, *J* = 8.6 Hz, 4H), 5.63 (s, 4H).

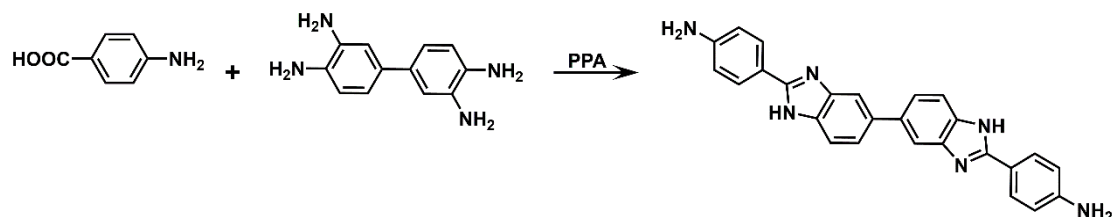

Scheme S1. Synthesis of BB.

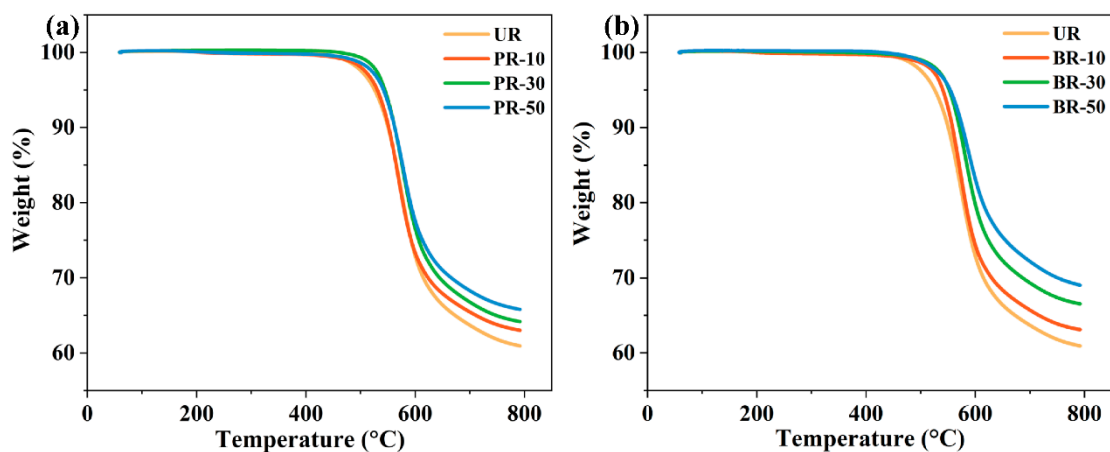

**Figure S1.** TGA curves of PI films (a) series PR and (b) series BR.

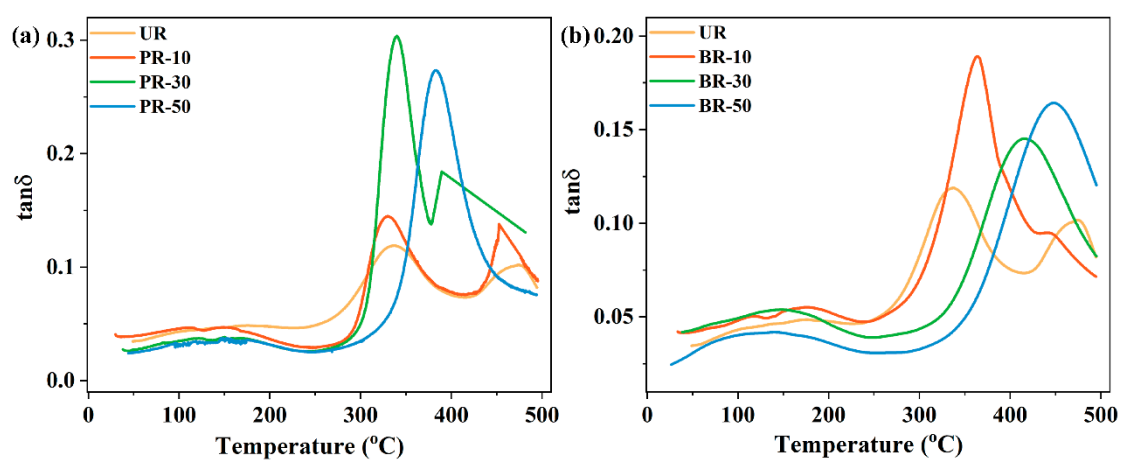

**Figure S2.** DMA curves of PI films(a) series PR and (b) series BR.

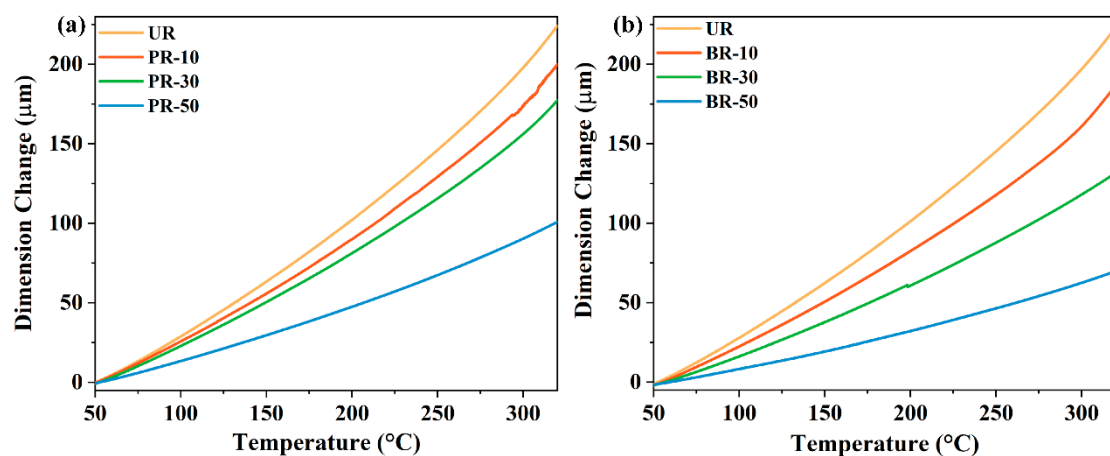

**Figure S3.** TMA curves of PI films(a) series PR and (b) series BR.

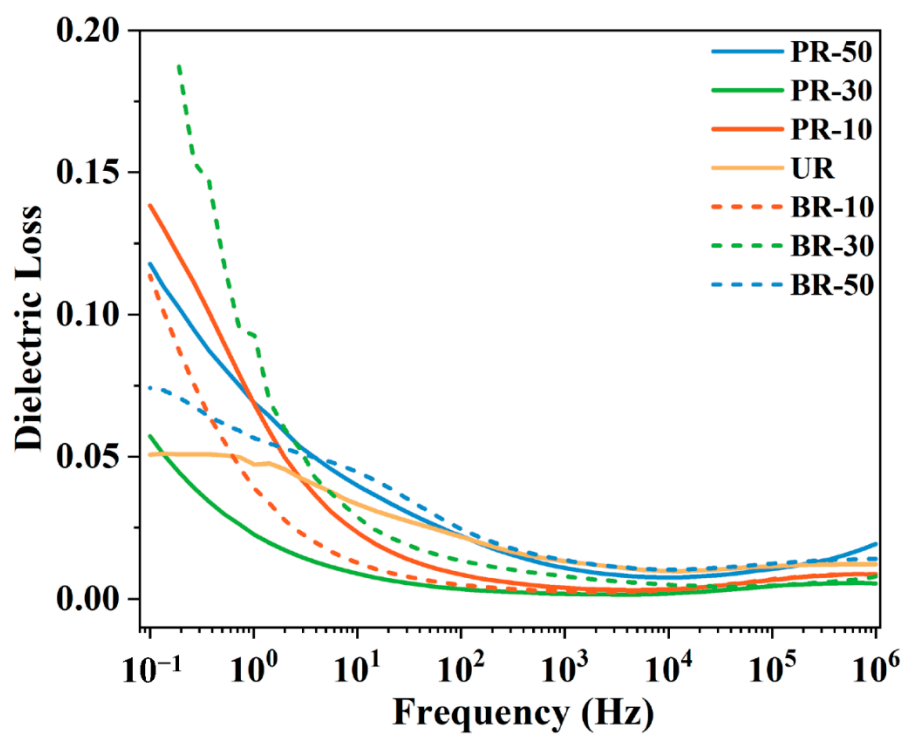

**Figure S4.** Frequency-scan broadband dielectric loss spectroscopy of polyimides.
